# Supplementary material
Source: PubMed Central journal article supplement (PMC3123046)

Table S1. **Summary of the bioinformatic analysis targeting potential new substrates for PC5/6.** Listed are the most relevant protein candidates (mouse) selected based on the following screening criteria: i) presence of a signal peptide; ii) presence of a PC5/6 specific cleavage site (R/K)-X<sub>n</sub>-R↓N ( $n = 0, 2, 4, \text{ or } 6$  and X is any aa, except Cys); iii) the proteins/peptides have cardiac relevance when their gene is knocked out; iv) the cleavage site motif is conserved in both human and mouse. In bold are depicted the candidates considered for in vitro digestion experiments with the four constitutively secreted PCs: furin, PACE4, PC5/6, and PC7. The synthetic peptides designed for this purpose are also listed in bold. TM, transmembrane domains

| UniProt # | Symbol | Protein                                       | Length<br>(aa) | Motif                                   | TM  |
|-----------|--------|-----------------------------------------------|----------------|-----------------------------------------|-----|
|           |        |                                               |                | Studied peptide                         |     |
| Q9R229    | BMP10  | Bone morphogenetic protein 10                 | 421            | DSSAR <u>I</u> RR <sub>313</sub> NAKG   | -   |
| Q62226    | Shh    | Sonic hedgehog                                | 437            | SGRYEGK <u>I</u> TR <sub>69</sub> NSE   | -   |
| P29319-1  | Epha3  | Ephrin type-A receptor 3                      | 983            | TIKKDR <u>T</u> SR <sub>449</sub> NSISL | 1   |
| O08852    | Pkd1   | Polycystin-1                                  | 4293           | QVLMRR <u>S</u> QR <sub>2162</sub> NYLE | > 1 |
| O88393    | Tgfr3  | Transforming growth factor, beta receptor III | 850            | TEL <u>K</u> IAR <sub>183</sub> NIYI    | 1   |
| Q62181    | Sema3c | Semaphorin-3C                                 | 751            | <u>K</u> AYR <sub>573</sub> N           | -   |
| Q01279    | Egfr   | Epidermal growth factor receptor              | 1210           | <u>R</u> ELPMR <sub>138</sub> N         | 1   |
| P11276    | Fn1    | Fibronectin 1                                 | 2477           | <u>R</u> LPVNR <sub>957</sub> N         | -   |
|           |        |                                               |                | <u>R</u> VPPSR <sub>1500</sub> N        |     |
| Q62009    | Postn  | Periostin                                     | 838            | <u>K</u> QGR <sub>483</sub> N           | -   |

Supplemental Table S1

Table S2. **Comparison of the in vitro processing of 12-mer mouse BMP10 peptides, WT-mBMP10 and N315D-mBMP10, at the predicted  $\underline{R}_{311}\underline{IRR}_{314}\downarrow$  cleavage site, and the kinetic constants of the furin cleavage of the WT peptide.** (A) Each synthetic peptide (200  $\mu$ M) was incubated for 2h in vitro with 2U of purified soluble furin, PC5/6, PACE4, or PC7, as described in Materials and Methods. The products were separated by RP-HPLC and detected at 214 nm. The % cleavage was calculated as the ratio of the normalized peak areas (peak area/number of peptide bonds) of the C-terminal fragment (NAKG for WT-mBMP10, or DAKG for N315-DmBMP10) and of the intact 12-mer peptide (at time zero). n.d., not determined. (B) Calculated kinetic constants from the digestion of the 12-mer WT peptide. Fitted values  $\pm$  SD to the fit.

**A**

| Peptide<br>(200 $\mu$ M) | Sequence                                               | hFurin | hPACE4 | hPC5 | rPC7 |
|--------------------------|--------------------------------------------------------|--------|--------|------|------|
| WT-<br>mBMP10            | DSSAR <sub>310</sub> IRR <sub>313</sub> ↓NAKG          | 86%    | 67%    | 68%  | 4%   |
| N314D-<br>mBMP10         | DSSAR <sub>310</sub> IRR <sub>313</sub> ↓ <b>D</b> AKG | 42%    | 30%    | 23%  | n.d. |

**B**

| $K_{m(app)}$<br>( $\mu$ M) | $V_{max(app)}$<br>( $\mu$ M $\cdot$ h <sup>-1</sup> ) | $V_{max(app)}/K_{m(app)}$<br>(h <sup>-1</sup> ) |
|----------------------------|-------------------------------------------------------|-------------------------------------------------|
| 34.9 $\pm$ 8.1             | 65.5 $\pm$ 5.4                                        | 1.9                                             |

Fig. S1. **Schematic representation of the mouse preproBMP10 and its processed forms.** Upon removal of the signal peptide (SP), the resulting inactive BMP10 precursor (proBMP10; ~ 60 kDa) is proteolytically processed at the motif RIRR↓ into a 108 aa mature growth factor. Mature BMP10 contains the conserved pattern of 7 cysteines (depicted in ball-stick representation) out of which one is engaged in an interchain disulfide bond. Also shown are the predicted N-glycosylation sites (N67, N131) and the sequence of the 12-mer peptide (mBMP10 peptide) encompassing the predicted cleavage site of mouse proBMP10, which was used for the in vitro digestion studies.

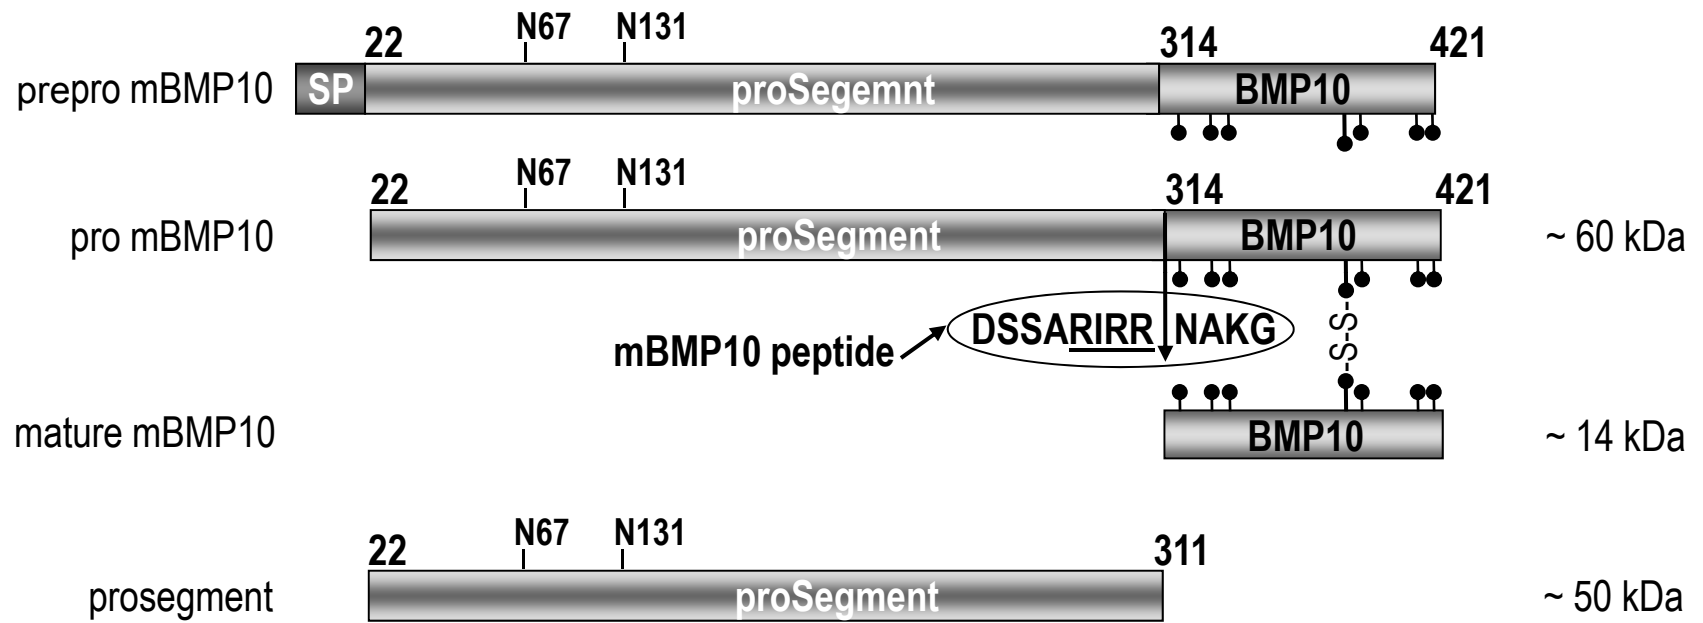

Supplemental Figure S1

**Fig. S2. Endo H and PNGase F sensitivity of proBMP10 and processed BMP10 (prosegment).** **(A)** Cell lysates and 20h conditioned media from COS-1 cells transiently transfected with (ProtC)-BMP10 were subjected to digestion with either PNGase F or endo H. The digestion mixtures were analyzed by Western blotting using a mouse ProtC Ab. The blot shows that both secreted proBMP10 and prosegment are PNGase F sensitive and endo H resistant. In the cells, proBMP10 is sensitive to both PNGase F and endo H. Note the presence in the cells of a non-specific band (\*) just below and partially overlapping with the specific band resulting from the digestion with either of the two glycosidases. A control from cells expressing an empty vector is shown for reference. **(B)** Western blot of PNGase F digestion product of cell lysates from the furin-deficient CHO-FD11 cells expressing (ProtC)-BMP10 (proBMP10), as compared to control undigested protein. Note that in these cells the non-specific band seen in COS-1 cells (\* in panel **A**) is not present.

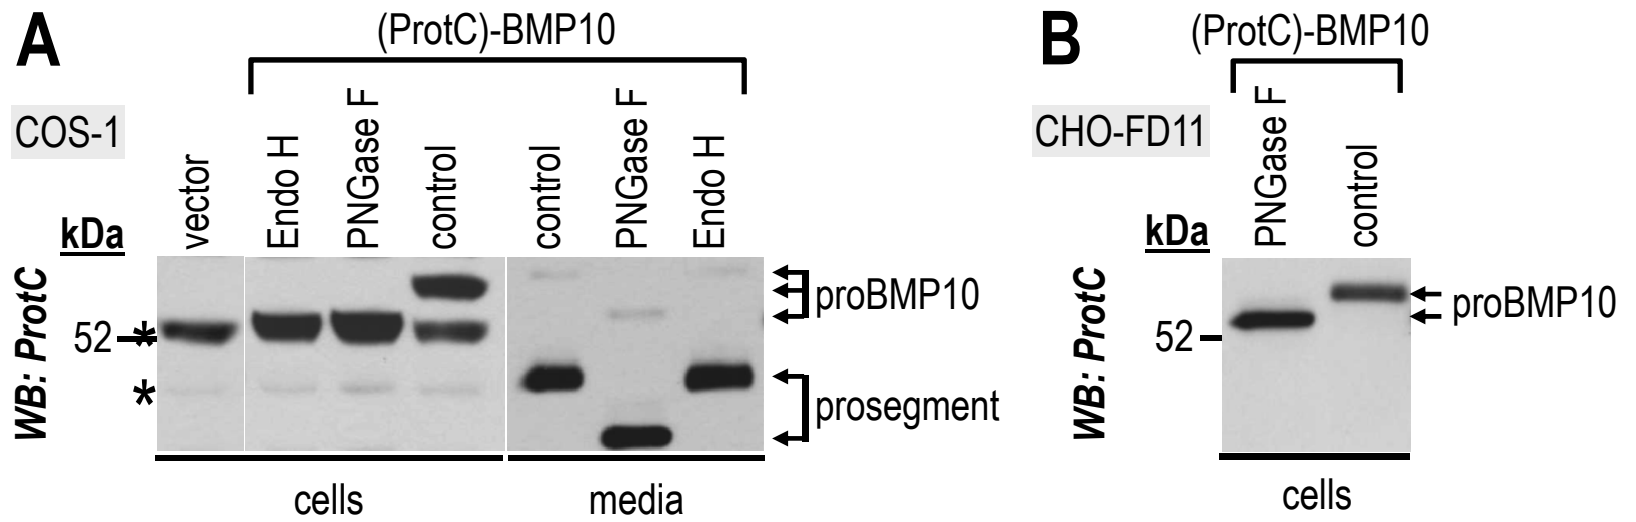

Supplemental Figure S2



**Fig. S3. Effects of RVKR-cmk and D6R on the TGN processing of the neuroendocrine secretory precursor protein pro7B2 into 7B2.** Western blot analyses of 20h conditioned media from COS-1 cells transiently expressing either no protein (vector) or mouse pro7B2 and collected after no treatment (DMSO) or treatment with either the cell permeable convertase inhibitor RVKR-cmk (30  $\mu$ M) or the cell surface inhibitor D6R (20  $\mu$ M) . Proteins were revealed with a rabbit 7B2 Ab (1).

(1) Seidah, N. G., Hsi, K. L., De Serres, G., Rochemont, J., Hamelin, J., Antakly, T., Cantin, M., and Chretien, M. (1983) *Arch. Biochem. Biophys.* **225**, 525-534

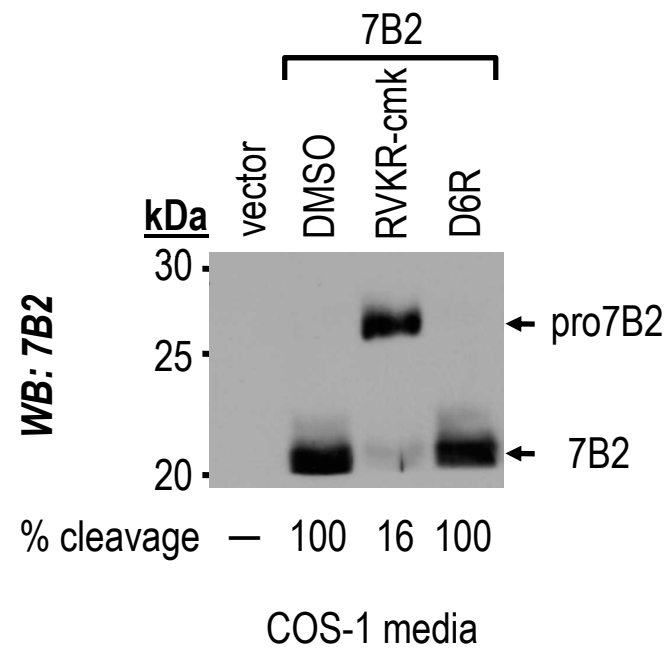

Fig. S4. **The transmembrane domain of furin is required for its efficient processing of proBMP10.** **(A)** Schematic diagram depicting human proFurin and proPC7 and chimeras of human furin generated by the swapping of its transmembrane (TM) and/or cytoplasmic (CT) domains with the corresponding human PC7 ones (furin<sub>CT-PC7</sub>; furin<sub>TMCT-PC7</sub>) (33). **(B)** Western blot analyses of the 20h conditioned media from CHO-FD11 cells transiently transfected with either empty vector (vector; lane 6), or with a vector expressing (ProtC)-BMP10 and vectors expressing furin<sub>CT-PC7</sub> (lane 1), furin<sub>TMCT-PC7</sub> (lane 2), soluble furin (sFurin; lane 3), furin (lane 4), or empty vector (vector; lane 5). Proteins were revealed with a rabbit ProtC Ab. Please note that the two panels of the figure come from different parts of the same blot.

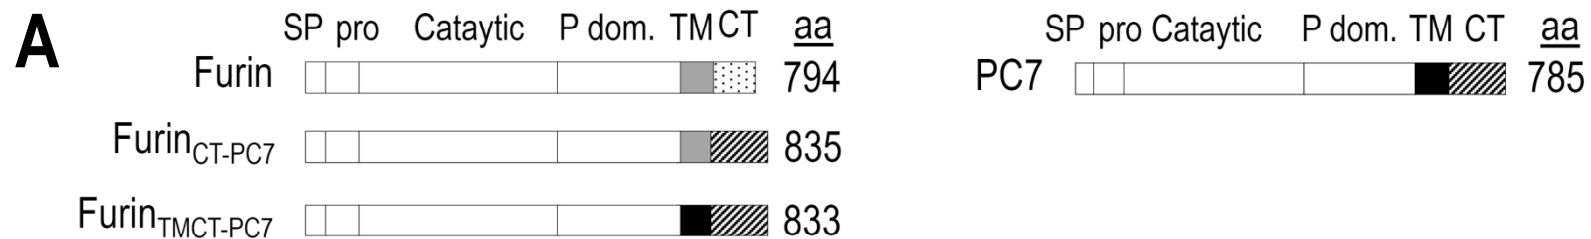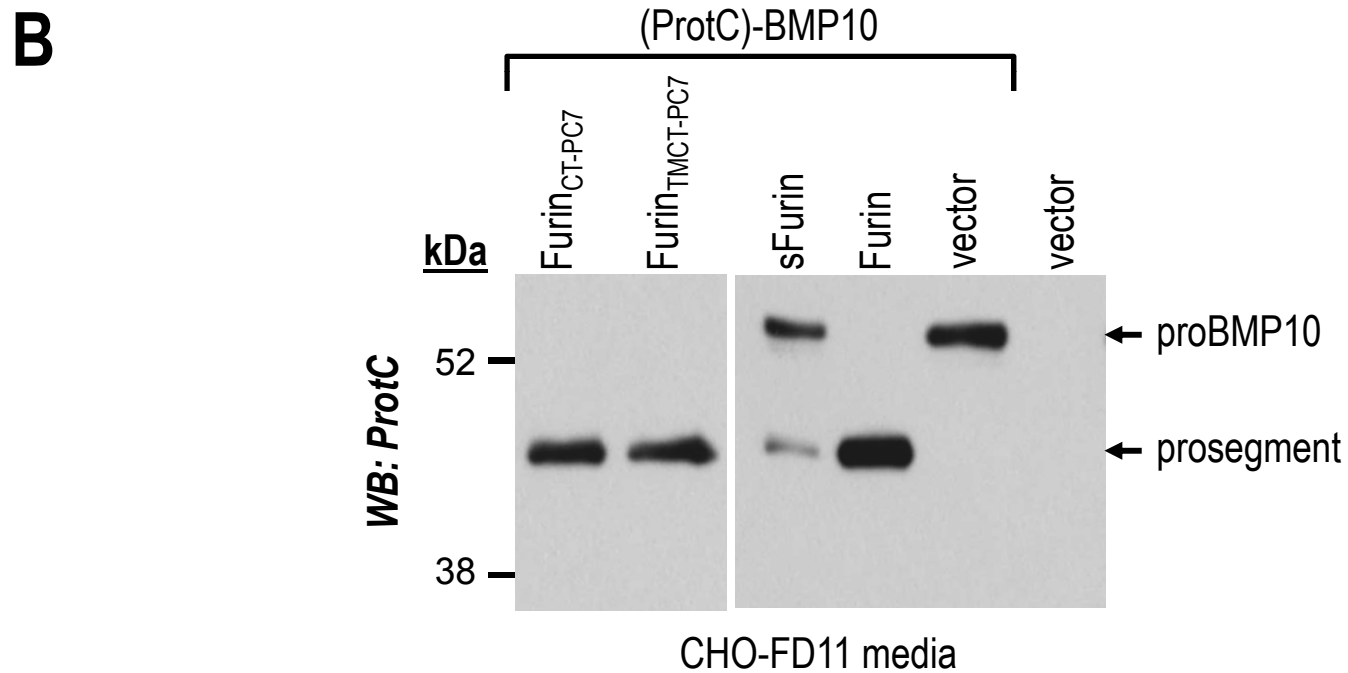

**Fig. S5. In mouse heart, PACE4 does not significantly contribute to the processing of proBMP10. (A)** Tissue extracts from right atria isolated from adult male mice, WT and total PACE4 knockout (PACE4-KO), were analyzed by Western blotting using mouse BMP10 or  $\beta$ -actin antibodies.  $\beta$ -actin was used as a loading control. Proteins were resolved on SDS-PAGE 8% Tris-tricine gels under non-reducing conditions. The migration position of mature BMP10 is emphasized. **(B)** The bands from Western blot in (A) were quantitated using ImageJ software (National Institutes of Health) and the relative band intensities of mature BMP10 and  $\beta$ -actin were plotted for WT (patterned bar) and total PACE4-KO (grey bar) mice. Means  $\pm$  SDEV are given and n = 5-7 mice per group. There is no significant difference between the two groups.

**A**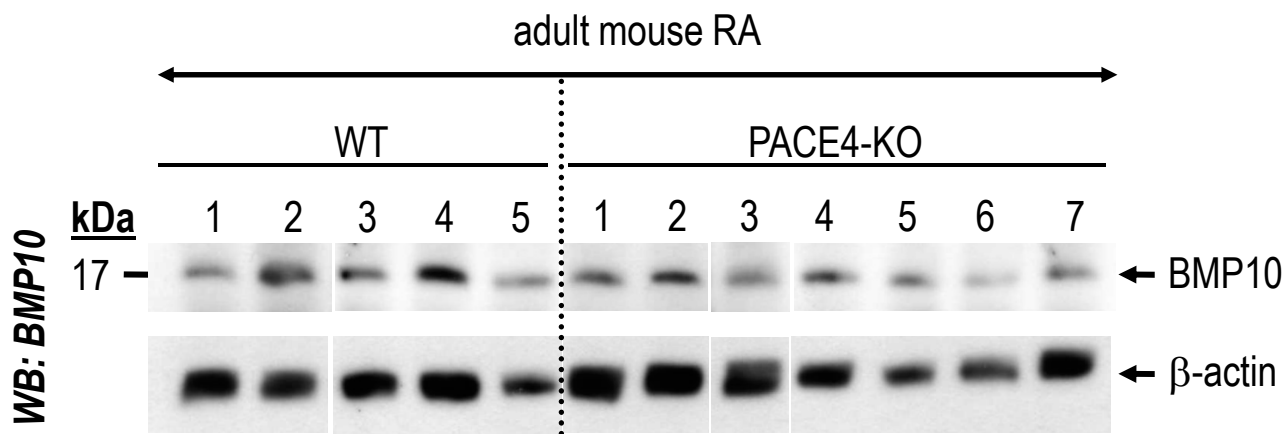**B**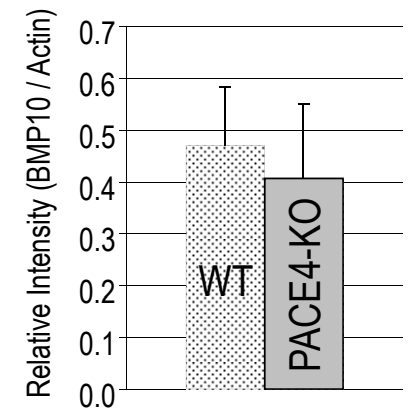

Supplement: supp_M111.233577_Supplemental.pdf [file supp_M111.233577_Supplemental.pdf]
